# Supplementary material for: Effects of the Fe/Ni ratio in double half-Heusler composition HfFe1−xNixSb
Source: Royal Society of Chemistry journal article supplement (doi:10.1039/d4tc03206c), 2024-11-29
Supplement: d4tc03206c1.pdf [file d4tc03206c1.pdf]

## Supporting Information

### Effects of Fe/Ni ratio in double half Heusler composition $\text{HfFe}_{1-x}\text{Ni}_x\text{Sb}$

Kazuki Imasato<sup>1,2\*</sup>, Philipp Sauerschnig<sup>1</sup>, Masanobu Miyata<sup>1</sup>, Takao Ishida<sup>1</sup>, Atsushi

Yamamoto<sup>1</sup>, Michihiro Ohta<sup>1</sup>

<sup>1</sup> Global Zero Emission Research Center, National Institute of Advanced Industrial Science and Technology (AIST), Tsukuba, Ibaraki 305-8569, Japan

<sup>2</sup> Max Planck Institute for Chemical Physics of Solids, Dresden, 01187, Germany

email: kazuki-imasato@aist.go.jp

\* Corresponding Author

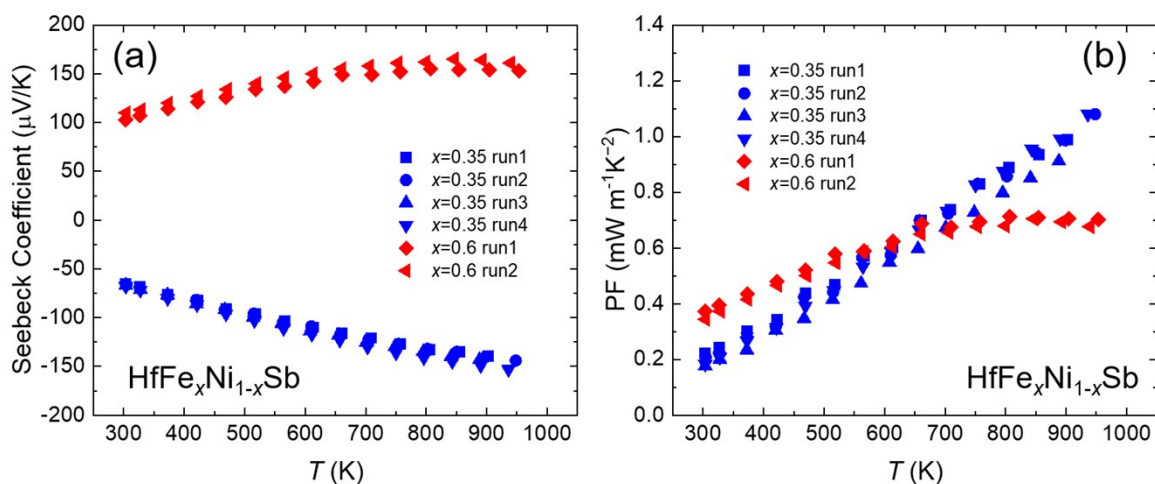

Figure S1 Repetitive measurement of (a) Seebeck coefficient and (b) power factor on  $\text{HfFe}_{0.35}\text{Ni}_{0.65}\text{Sb}$  ( $x=0.35$ , sample 2) and  $x=0.6$   $\text{HfFe}_{0.6}\text{Ni}_{0.4}\text{Sb}$  ( $x=0.6$ , sample 2) showing the stability of these compositions up to 950 K.
